# Supplementary material for: Feasibility Study of NMR Based Serum Metabolomic Profiling to Animal Health Monitoring: A Case Study on Iron Storage Disease in Captive Sumatran Rhinoceros (Dicerorhinus sumatrensis)
Source: PubMed Central journal article supplement (PMC4883739; doi:10.1371/journal.pone.0156318), 2016-05-27

**Figure S3. Environmental effect in Sumatran rhinoceros serum metabolome.** PCA scores plot (A) and the PCA score average (B) of serum samples from the animals maintained at the Cincinnati Zoo, USA, Rhino-1(x), Rhino-2(●), Rhino-3( $\Delta$ -green), and the Sumatran Rhino Conservation Center, Malaysia, Rhino-4~7( $\blacklozenge$ -yellow) indicating the metabolic differences associated with the different living environment.

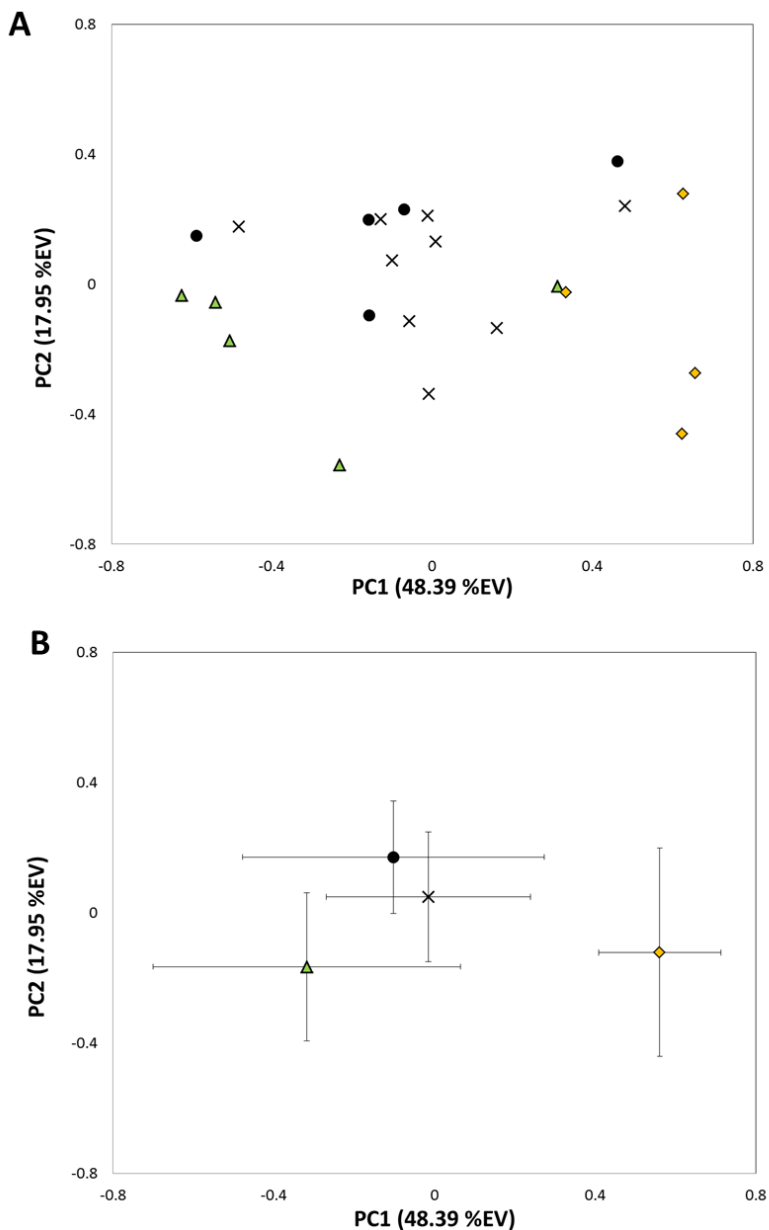

Supplement: pone.0156318.s003.pdf [file pone.0156318.s003.pdf]
